# Supplementary material
Source: HighWire-hosted journal article supplement (https://spcare.bmj.com/content/bmjspcare-2022-003563)
Supplement: inline-supplementary-material-3 [file inline-supplementary-material-3.pdf]

| Treatment type               | Includes                                                                                                                                                                                                                                                                                                                                                     |                                                                                                                                                                                                                                                                                                                                  |
|------------------------------|--------------------------------------------------------------------------------------------------------------------------------------------------------------------------------------------------------------------------------------------------------------------------------------------------------------------------------------------------------------|----------------------------------------------------------------------------------------------------------------------------------------------------------------------------------------------------------------------------------------------------------------------------------------------------------------------------------|
| Active/invasive treatment    | Intravenous cannula<br>Central line<br>Lavage/emesis/charcoal<br>Eye irrigation<br>Intubation & Endotracheal tubes<br>Laryngeal mask airways<br>Rapid sequence induction<br>Chest drain<br>Defibrillation/pacing<br>Resuscitation/CPR<br>Anaesthesia<br>Nebuliser/spacer<br>Parenteral thrombolysis<br>Other Parenteral drugs<br>Nasal airway<br>Oral airway | Supplemental oxygen<br>Continuous positive airways pressure<br>Nasal intermittent positive pressure ventilation<br>Bag-valve mask<br>Arterial line<br>Infusion fluids<br>Blood product transfusion<br>Pericardiocentesis<br>Lumbar puncture<br>Active rewarming of the hypothermic patient<br>Cooling - control body temperature |
| Minor procedure or treatment | Manipulation<br>Incision & drainage<br>Urinary catheter/suprapubic<br>Minor surgery<br>Tetanus<br>Joint aspiration                                                                                                                                                                                                                                           | Minor plastic procedure<br>Split skin graft*<br>Medication administered (oral)<br>Prescription/medicines prepared to take away                                                                                                                                                                                                   |
| Injury                       | Dressing<br>Bandage/support<br>Sutures<br>Wound closure (excluding sutures)<br>Plaster of Paris                                                                                                                                                                                                                                                              | Splint<br>Removal foreign body<br>Wound cleaning<br>Sling/collar cuff/broad arm sling                                                                                                                                                                                                                                            |
| AHP involvement              | Physiotherapy<br>OT                                                                                                                                                                                                                                                                                                                                          | Social work intervention<br>Loan of walking aid                                                                                                                                                                                                                                                                                  |
| Observation                  | Recording vital signs<br>Observation<br>Electrocardiogram                                                                                                                                                                                                                                                                                                    | Pulse oximetry<br>Head injury observation                                                                                                                                                                                                                                                                                        |
| Other treatment              | Burns review<br>Recall/x-ray review<br>Fracture review<br>Dressing/wound review                                                                                                                                                                                                                                                                              | Epistaxis control<br>Eye<br>Dental treatment<br>Other                                                                                                                                                                                                                                                                            |
| No treatment                 | None                                                                                                                                                                                                                                                                                                                                                         |                                                                                                                                                                                                                                                                                                                                  |

*Supplementary table. Treatments administered in ED by category.*
